# Supplementary material for: Graphene boosts thermoelectric performance of a Zintl phase compound
Source: Royal Society of Chemistry journal article supplement (doi:10.1039/c4ra15456h), 2015-01-01
Supplement: c4ra15456h1.pdf [file c4ra15456h1.pdf]

## Graphene Boost thermoelectric Performance of a Zintl phase Compound

A. Bhardwaj, A. K. Shukla, S. R. Dhakate and D. K. Misra\*

CSIR-Network of Institutes for Solar Energy, Materials Physics & Engineering Division, CSIR-  
National Physical Laboratory, Dr K.S. Krishnan Marg, New Delhi-110012

### Supplementary Information:

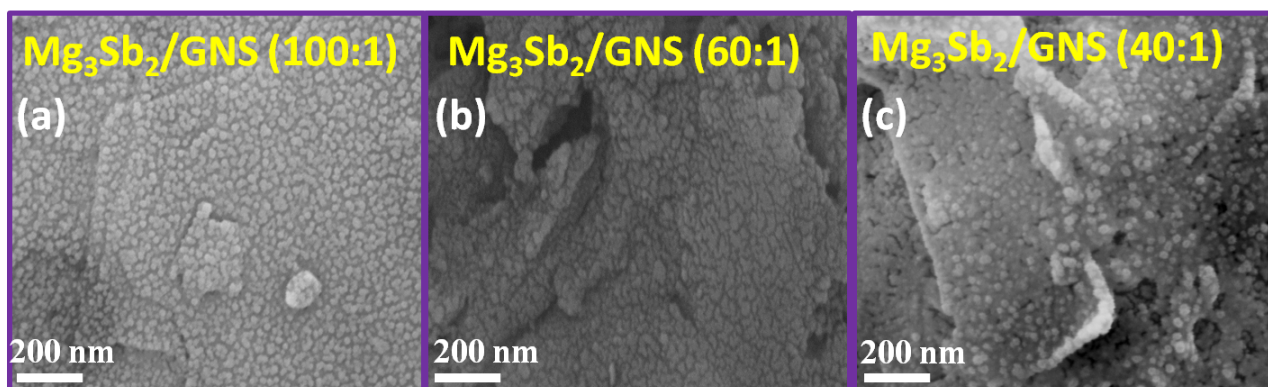

**Figure S1:** (a) The FE-SEM image of nanocomposite  $\text{Mg}_3\text{Sb}_2/\text{GNS}$  with mass ratio 100:1 (b) nanocomposite  $\text{Mg}_3\text{Sb}_2/\text{GNS}$  with mass ratio 60:1 (c) nanocomposite  $\text{Mg}_3\text{Sb}_2/\text{GNS}$  with mass ratio 40:1 which are clearly showing reduction in the size of  $\text{Mg}_3\text{Sb}_2$  particle on increasing the amount of graphene. All of the nanocomposite samples show smaller particle size of  $\text{Mg}_3\text{Sb}_2$  and decreases with increasing GNS concentration.
